# Supplementary material
Source: PubMed Central journal article supplement (PMC7869776)
Supplement: btz561_supplementary_data.pdf [file btz561_supplementary_data.pdf]

# GSMA: an approach to identify robust global and test Gene Signatures using Meta-Analysis

## Supplementary Material

Adib Shafi<sup>1</sup>, Tin Nguyen<sup>2</sup>, Azam Peyvandipour<sup>1</sup> and Sorin Draghici<sup>1,3\*</sup>

<sup>1</sup>Department of Computer Science, Wayne State University, Detroit, MI 48202

<sup>2</sup>Department of Computer Science and Engineering, University of Nevada, Reno, NV 89557

<sup>3</sup>Department of Obstetrics and Gynecology, Wayne State University, Detroit, MI 48202

## 1 Dataset Description

The R programming language was used to generate all the results included in the proposed manuscript. We download the raw probe level datasets from Gene Expression Omnibus. All the datasets used in this manuscript are described in Table S1.

Datasets from Affymetrix platform are normalized using RMA background adjustment, quantile normalization and median polish summarization. We use the *threestep* function from *affyPLM* package to achieve this goal [1]. For probe to gene mapping, standard genome wide annotation packages are used from bioconductor. Median values are taken whenever multiple probes mapped to the same gene. Datasets from Illumina platform are normalized using the *neqc* function from *limma* package [2]. Finally dataset from Agilent platform is normalized using *limma* package as well.

Table S1: Description of the 21 gene expression datasets used in the manuscript.

AD: Alzheimer’s disease, Inf: Influenza, FC: Frontal cortex, TC: Temporal cortex, EC: Entorhinal cortex, HIP: Hippocampus, MTG: Medial Temporal Gyrus, PC: Posterior Cingulate, SFG: Superior Frontal Gyrus and VCX: Primary Visual Cortex

|    | Datasets | Disease | Discovery/<br>validation | Number of<br>samples | Contrast                | Tissue                        | Platform                     |
|----|----------|---------|--------------------------|----------------------|-------------------------|-------------------------------|------------------------------|
| 1  | GSE48350 | AD      | Discovery                | 253                  | 173 Norm. vs 80 AD      | EC, PCG                       | Affymetrix HG U133 Plus 2.0  |
| 2  | GSE63061 | AD      | Discovery                | 273                  | 134 Norm. vs 139 AD     | Blood                         | Illumina HumanHT-12 4.0      |
| 3  | GSE63060 | AD      | Discovery                | 249                  | 104 Norm. vs 145 AD     | Blood                         | Illumina HumanHT-12 3.0      |
| 4  | GSE26927 | AD      | Discovery                | 118                  | 18 Norm. vs 100 AD      | EC                            | Illumina HumanRef-8 2.0      |
| 5  | GSE1297  | AD      | Discovery                | 31                   | 9 Norm. vs 22 AD        | HIP                           | Affymetrix HG U133A          |
| 6  | GSE15222 | AD      | Validation               | 363                  | 187 Norm. vs 176 AD     | TC                            | Illumina Sentrix HumanRef-8  |
| 7  | GSE5281  | AD      | Validation               | 161                  | 74 Norm. vs 87 AD       | EC, MTG, PC,<br>SFG, HIP, PVC | Affymetrix HG U133 Plus 2.0  |
| 8  | GSE36980 | AD      | Validation               | 79                   | 47 Norm. vs 32 AD       | FC, TC, HIP                   | Affymetrix Human Gene 1.0 ST |
| 9  | GSE28146 | AD      | Validation               | 30                   | 8 Norm. vs 22 AD        | HIP                           | Affymetrix HG U133 Plus 2.0  |
| 10 | GSE39420 | AD      | Validation               | 21                   | 7 Norm. vs 14 AD        | PC                            | Affymetrix Human Gene 1.1 ST |
| 11 | GSE12685 | AD      | Validation               | 14                   | 8 Norm. vs 6 AD         | FC                            | Affymetrix HG U133A          |
| 12 | GSE17156 | Inf     | Discovery                | 34                   | 17 Norm. vs 17 Inf      | Peripheral blood              | Affymetrix HG U133A 2.0      |
| 13 | GSE42026 | Inf     | Discovery                | 52                   | 33 Norm. vs 19 Inf      | Whole blood                   | Illumina HumanHT-12 3.0      |
| 14 | GSE21802 | Inf     | Discovery                | 23                   | 4 Norm. vs 19 Inf       | Whole blood                   | Illumina HumanWG-6 2.0       |
| 15 | GSE40012 | Inf     | Discovery                | 75                   | 36 Norm. vs 39 Inf      | Whole blood                   | Illumina HumanHT-12 3.0      |
| 16 | GSE29366 | Inf     | Validation               | 31                   | 12 Norm. vs 19 Inf      | Whole blood                   | Illumina HumanWG-6 3.0       |
| 17 | GSE30550 | Inf     | Validation               | 33                   | 16 Norm. vs 17 Inf      | Peripheral blood              | Affymetrix HG U133A 2.0      |
| 18 | GSE20346 | Inf     | Validation               | 45                   | 26 Bac. pneu. vs 19 Inf | Whole blood                   | Illumina HumanHT-12 3.0      |
| 19 | GSE34205 | Inf     | Validation               | 50                   | 22 Norm. vs 28 Inf      | PBMC                          | Affymetrix HG U133 Plus 2.0  |
| 20 | GSE82050 | Inf     | Validation               | 39                   | 15 Norm. vs 24 Inf      | Blood                         | Agilent SP G3 Human GE 3.0   |
| 21 | GSE38900 | Inf     | Validation               | 46                   | 30 Rhinovirus vs 16 Inf | Whole blood                   | Illumina HumanWG-6 3.0       |

## Materials and Methods

The overall pipeline of the proposed framework is described in the main text. The algorithm used to perform *intra*- and *inter*-level analysis is described in the Figure S1. We utilize the *BLMA* package [3] from bioconductor to achieve this task.

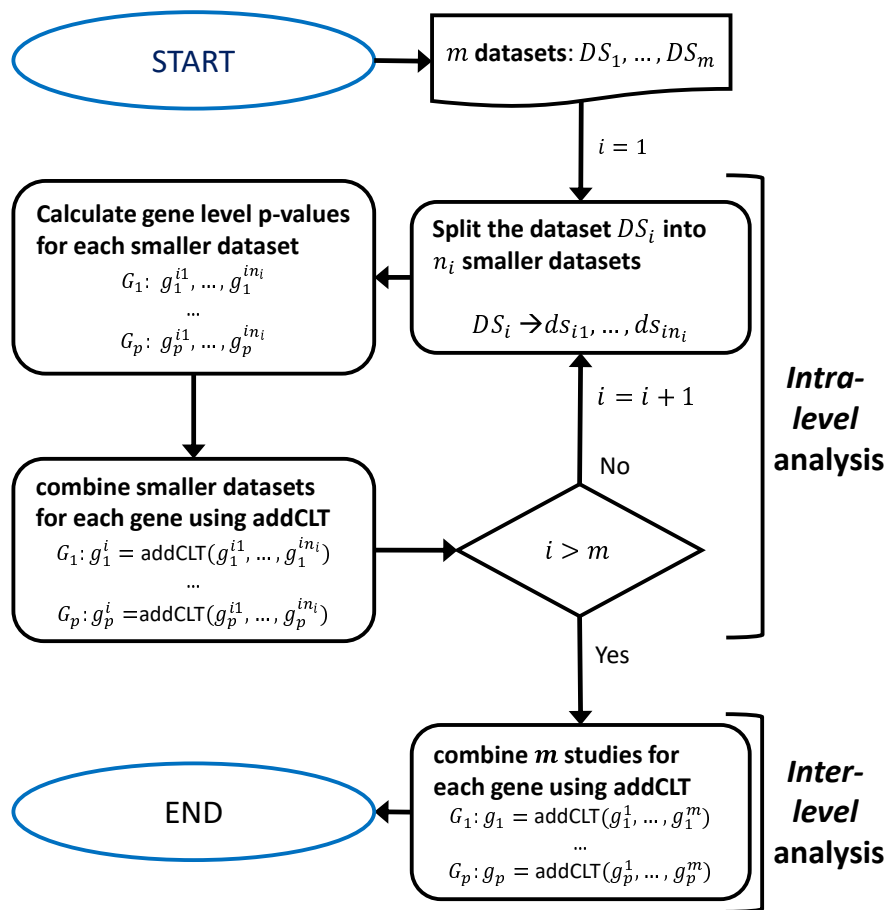

Figure S1: The gene level meta-analysis pipeline is performed in two stages: *intra-level* analysis and *inter-level* analysis. In the *intra-level* analysis, each dataset is divided into smaller datasets such that each smaller dataset consists of all the control samples and a subset of the disease samples. For each gene, p-values are calculated using moderated t-test and later combined using *addCLT*. In the *inter-level* analysis, *intra-level* p-values coming from individual datasets are combined using the same technique in order to compute meta p-value for each gene. Final output of the framework is a list of genes that are differentially expressed across the phenotypes of a given disease.

To compare with the p-value based approaches, we create four frameworks – each framework takes normalized gene expression datasets of a given disease as input, computes gene level p-values using moderated t-test for each dataset, and combines the individual studies for each gene using the chosen meta-analysis approach. Meta p-values are corrected using the FDR approach. *Leave-one-out* (LOO) analysis is performed for each of these four frameworks to select the genes that are not influenced by one single study. To select the significant genes, we use the same threshold that was used in the proposed framework. To compare with INMEX, we provide the gene level expression matrices as input in the web interface [4] and performed meta-analysis using both fixed effect model and random effect model, using the default settings. We rank the output genes with their absolute effect sizes (decreasing order). To compare with MetaIntegrator, we utilize the *MetaIntegrator* package from Bioconductor [5]. Similar to the above frameworks, we provide the gene level expression matrices and perform the LOO in the similar way as we did for the proposed framework. For the rank aggregation based method, we use the *RankAggreg* package from CRAN. This package requires the rank of the genes from multiple datasets as input and provides the combined ranks of the genes as output. At first, we compute gene level p-values for each dataset using moderated t-test and rank them based on their FDR corrected p-values. We choose the top significant genes from each dataset, using the same threshold used in the proposed framework. We use the default settings of the function provided in the package.

## 2 Results

We apply the proposed approach on 1108 samples from 9 independent training datasets related to two conditions: Alzheimer’s disease (AD) and influenza. We evaluate the *global signature* using the target pathway enrichment approach and the *test signature* using an additional 912 samples from 12 independent validation datasets. Description of the findings are explained in the main text. The pathway enrichment results are computed using KEGG database [6] (version 84.0) that includes 204 signaling pathways. For both diseases, we compare the results of the proposed meta-analysis framework (GSMA) with the results of the eight other existing meta-analysis approaches. Among them, four approaches are p-value based (i.e., Fisher’s method, Stouffer’s method, minP, and maxP), three approaches are effect-size based (i.e., inmex fixed-effect model (inmex\_FEM) [7], inmex random-effect model (inmex.REM) [7], and MetaIntegrator [8]), and one approach is rank aggregation based (i.e., RankAggreg [9]).

### 2.1 Alzheimer’s Disease

We apply GSMA on 924 samples from 5 individual studies and identify 89 genes as the *global signature* and 7 genes as the *test signature*. We validate the *test signature* using an additional 668 samples from 6 individual validation studies. The two phenotypes for all the datasets are AD patients from different stages and healthy individuals.

Enriched pathways associated with the *global signature* identified by GSMA and the *global signature* identified by one given discovery dataset at a time are shown in the Table S2. The results show that GSMA is able to identify the target pathway at the very top. In contrast, the signatures obtained from any single analysis is not reproducible. In addition, they fail to identify the target pathway as significant in most of the cases. AUC plots of the 6 validation datasets based on the identified *test signatures* are illustrated in the Figure S2. The results indicate that the proposed approach outperforms any single analysis in 5 out of 6 cases by achieving higher AUC-ROC score.

The pathway enrichment results of the proposed framework and the existing approaches are shown in the Table S3. AUC scores of all 6 independent datasets are presented in the Table S4, whereas the AUC plots are presented in the Figure S3. Figure 3 in the main text explains the overall comparison between GSMA and the existing approaches.

### 2.2 Influenza

We apply the proposed framework on 184 samples from 4 individual studies and identify 153 genes as the *global signature* and 11 genes as the *test signature*. We validate the *test signature* using an additional 224 samples from 6 individual validation studies. In 8 out of 10 datasets, the two given phenotypes are influenza patients of different stages and healthy patients. Among the remaining 2 datasets, GSE20346 compares 19 influenza patients and 26 bacterial pneumonia patients whereas GSE38900 compares 16 influenza patients and 30 Rhinovirus patients.

The pathway enrichment results of the proposed framework and the existing approaches are shown in the Table S5. AUC scores of all 6 independent datasets are presented in the Table S6, whereas the AUC plots are presented in the Figure S5. Figure 4 in the main text explains the overall comparison between GSMA and the existing approaches.

Table S2: The results of the enrichment analysis performed on the genes in the *global signatures* for **Alzheimer's disease** identified by the proposed meta-analysis framework (GSMA) and using one given discovery dataset at a time. The red line represents 0.5% threshold and the green highlighted cell represents the target pathway. GSMA is able to identify the target pathway - *Alzheimer's disease*, at the very top. On the other hand, using one single dataset at a time, the results are not reproducible and significantly influenced by the given individual dataset. In 3 out of 5 discovery datasets, the identified *global signatures* fail to identify the target pathway as significant.

| GSMA                                                         |          | Discovery_ds_1                            |          | Discovery_ds_2                                         |          |
|--------------------------------------------------------------|----------|-------------------------------------------|----------|--------------------------------------------------------|----------|
| Pathway                                                      | p.fdr    | Pathway                                   | p.fdr    | Pathway                                                | p.fdr    |
| 1 Alzheimer's disease                                        | 2.24E-07 | Phagosome                                 | 0.0123   | Pathogenic Escherichia coli infection                  | 0.7973   |
| 2 Parkinson's disease                                        | 2.24E-07 | Pathogenic Escherichia coli infection     | 0.0123   | Cardiac muscle contraction                             | 1        |
| 3 Non-alcoholic fatty liver disease (NAFLD)                  | 3.63E-06 | Gap junction                              | 0.5592   | Vasopressin-regulated water re-absorption              | 1        |
| 4 Huntington's disease                                       | 3.12E-05 | Ferroptosis                               | 0.7871   | Cell cycle                                             | 1        |
| 5 Retrograde endocannabinoid signaling                       | 0.0028   | Platelet activation                       | 0.8279   | FoxO signaling pathway                                 | 1        |
| 6 Epithelial cell signaling in Helicobacter pylori infection | 0.0435   | Apelin signaling pathway                  | 0.9143   | Oxytocin signaling pathway                             | 1        |
| 7 Cardiac muscle contraction                                 | 0.0621   | cGMP-PKG signaling pathway                | 1        | Arrhythmogenic right ventricular cardiomyopathy (ARVC) | 1        |
| 8 Chagas disease (American trypanosomiasis)                  | 0.1430   | Alcoholism                                | 1        | Protein processing in endoplasmic reticulum            | 1        |
| 9 Adipocytokine signaling pathway                            | 0.2790   | Focal adhesion                            | 1        | RNA degradation                                        | 1        |
| 10 Epstein-Barr virus infection                              | 0.2790   | mRNA surveillance pathway                 | 1        | Hypertrophic cardiomyopathy (HCM)                      | 1        |
| Discovery_ds_3                                               |          | Discovery_ds_4                            |          | Discovery_ds_5                                         |          |
| Pathway                                                      | p.fdr    | Pathway                                   | p.fdr    | Pathway                                                | p.fdr    |
| 1 Adherens junction                                          | 0.0934   | Parkinson's disease                       | 8.41E-06 | Parkinson's disease                                    | 4.35E-07 |
| 2 Proteoglycans in cancer                                    | 0.3461   | Huntington's disease                      | 8.41E-06 | Alzheimer's disease                                    | 1.33E-06 |
| 3 Prolactin signaling pathway                                | 0.3625   | Alzheimer's disease                       | 2.49E-05 | Huntington's disease                                   | 2.85E-06 |
| 4 ErbB signaling pathway                                     | 0.4029   | Non-alcoholic fatty liver disease (NAFLD) | 9.63E-04 | Non-alcoholic fatty liver disease (NAFLD)              | 6.20E-04 |
| 5 Th1 and Th2 cell differentiation                           | 0.4029   | Homologous recombination                  | 0.0685   | Retrograde endocannabinoid signaling                   | 0.3385   |
| 6 Circadian entrainment                                      | 0.4029   | Cardiac muscle contraction                | 0.3019   | Homologous recombination                               | 0.7155   |
| 7 AGE-RAGE signaling pathway in diabetic complications       | 0.4029   | Retrograde endocannabinoid signaling      | 0.3019   | Hedgehog signaling pathway                             | 0.7775   |
| 8 Focal adhesion                                             | 0.4583   | Epstein-Barr virus infection              | 0.7548   | Vibrio cholerae infection                              | 0.7775   |
| 9 Type II diabetes mellitus                                  | 0.4653   | Vibrio cholerae infection                 | 0.7760   | Synaptic vesicle cycle                                 | 0.9895   |
| 10 Platelet activation                                       | 0.4653   | Synaptic vesicle cycle                    | 1        | Phagosome                                              | 0.9895   |

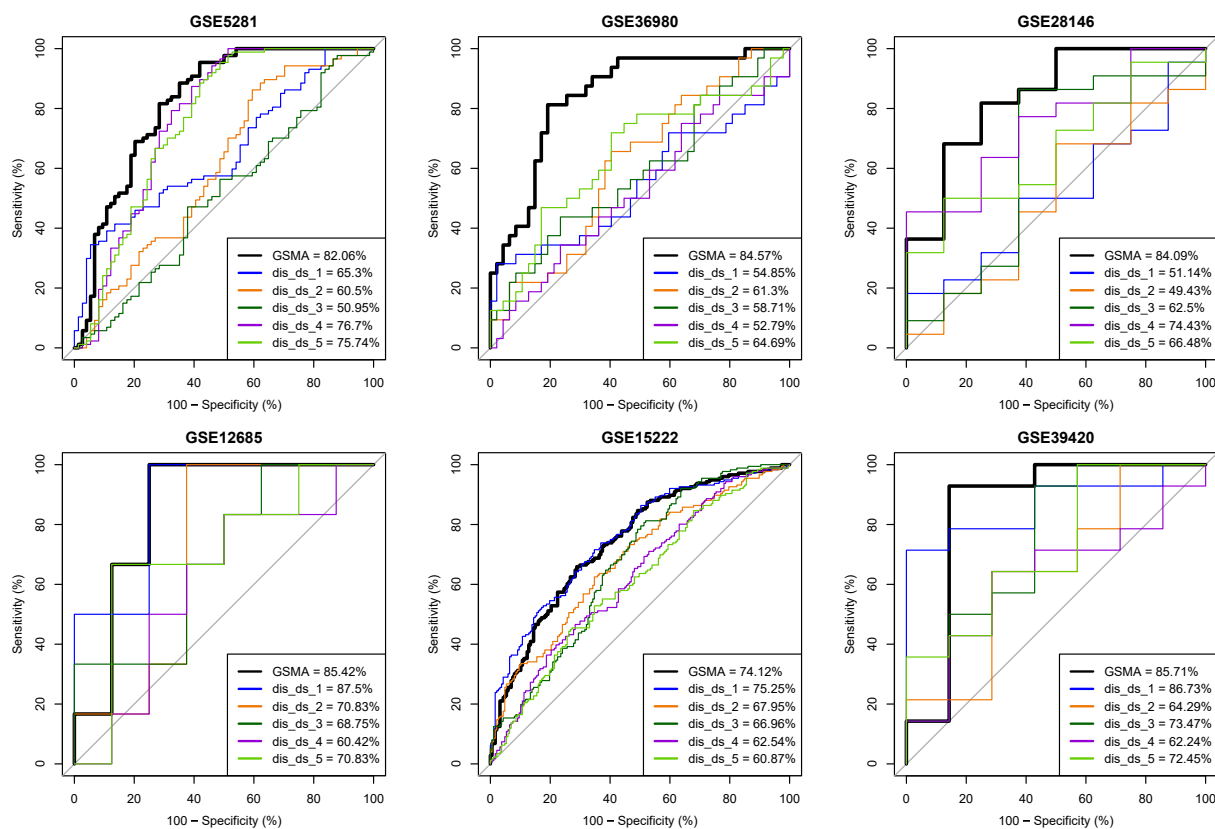

Figure S2: AUC plots across the 6 independent validation datasets related to **Alzheimer's disease**, based on the *test signature* identified by the proposed meta analysis framework - GSMA vs using one given discovery dataset at a time. The signature proposed by GSMA achieved higher AUC-ROC scores in 5 out of 6 independent datasets,

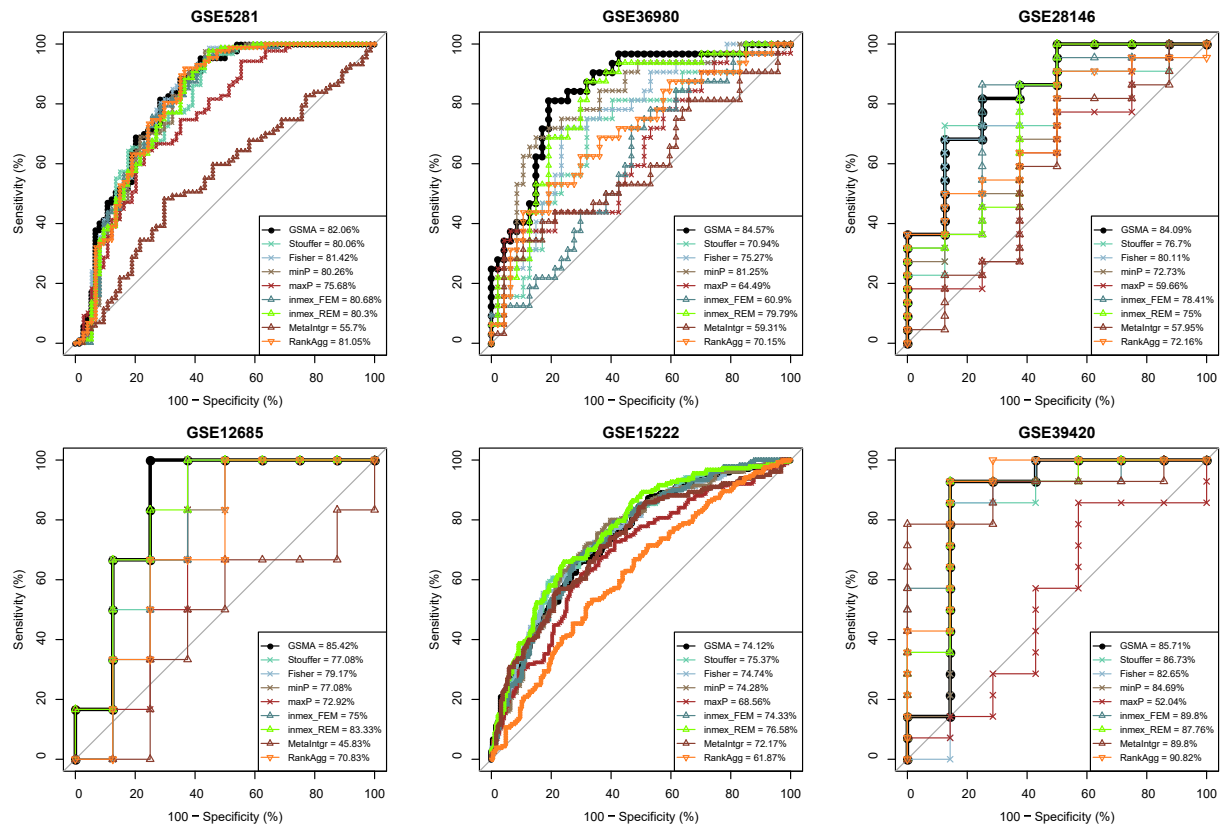

Figure S3: AUC plots across the 6 independent validation datasets related to **Alzheimer's disease** based on the *test signature*, identified by the proposed meta analysis framework - GSMA and the eight other existing meta-analysis approaches - Stouffer's method, Fisher's method, minP, maxP, innex\_FEM, innex\_REM, MetaIntegrator, and RankAggreg. The signature proposed by GSMA achieved highest AUC-ROC scores in 4 out of 6 independent datasets.

Table S3: The results of the enrichment analysis performed on the genes in the *global signatures* for **Alzheimer’s disease** identified by the proposed meta-analysis framework (GSMA) and the eight other existing meta-analysis approaches (Stouffer’s method, Fisher’s method, minP, maxP, inmex\_FEM, inmex\_REM, MetaIntegrator, and RankAggreg). The red line represents 0.5% threshold and the green highlighted cell represents the target pathway. Using the *global signatures* identified by the GSMA, Stouffer’s method, Fisher’s method, and RankAggreg, the enrichment analysis finds all three neurological disorder pathways (*Alzheimer’s disease*, *Parkinson’s disease* and *Huntington’s disease*) as significant. In contrast, the enrichment analysis performed with the *global signatures* identified by minP and maxP do not report any pathway as significant. The enrichment analysis performed on the signatures identified by MetaIntegrator reports two of the neurological disorder pathways as significant and rank them on top. The same analysis performed on the inmex\_FEM and inmex\_REM report some pathways as significantly enriched but none of them are the neurological disorder pathways. Interestingly, the other significant pathways reported by the enrichment analysis performed on the signatures identified by GSMA, *Non-alcoholic fatty liver disease (NAFLD)* and *Retrograde endocannabinoid signaling*, are also known to be involved in Alzheimer’s disease [10, 11, 12, 13].

| GSMA                                                         |          | Stouffer                                                   |          | Fisher                                                     |          |
|--------------------------------------------------------------|----------|------------------------------------------------------------|----------|------------------------------------------------------------|----------|
| Pathway                                                      | p.fdr    | Pathway                                                    | p.fdr    | Pathway                                                    | p.fdr    |
| 1 Alzheimer’s disease                                        | 2.24E-07 | Alzheimer’s disease                                        | 3.78E-06 | Alzheimer’s disease                                        | 1.59E-04 |
| 2 Parkinson’s disease                                        | 2.24E-07 | Parkinson’s disease                                        | 8.62E-05 | Parkinson’s disease                                        | 4.88E-04 |
| 3 Non-alcoholic fatty liver disease (NAFLD)                  | 3.63E-06 | Huntington’s disease                                       | 5.80E-04 | Huntington’s disease                                       | 0.0019   |
| 4 Huntington’s disease                                       | 3.12E-05 | Non-alcoholic fatty liver disease (NAFLD)                  | 0.0081   | Non-alcoholic fatty liver disease (NAFLD)                  | 0.0682   |
| 5 Retrograde endocannabinoid signaling                       | 0.0028   | Cardiac muscle contraction                                 | 0.0372   | Homologous recombination                                   | 0.3336   |
| 6 Epithelial cell signaling in Helicobacter pylori infection | 0.0435   | Epithelial cell signaling in Helicobacter pylori infection | 0.221    | Vibrio cholerae infection                                  | 0.3687   |
| 7 Cardiac muscle contraction                                 | 0.0621   | Retrograde endocannabinoid signaling                       | 0.2708   | Retrograde endocannabinoid signaling                       | 0.3687   |
| 8 Chagas disease (American trypanosomiasis)                  | 0.1430   | Homologous recombination                                   | 0.5698   | Synaptic vesicle cycle                                     | 0.4752   |
| 9 Adipocytokine signaling pathway                            | 0.2790   | Thyroid hormone signaling pathway                          | 0.6203   | Epithelial cell signaling in Helicobacter pylori infection | 0.4877   |
| 10 Epstein-Barr virus infection                              | 0.2790   | Vibrio cholerae infection                                  | 0.655    | Cardiac muscle contraction                                 | 0.5672   |
| minP                                                         |          | maxP                                                       |          | inmex_FEM                                                  |          |
| Pathway                                                      | p.fdr    | Pathway                                                    | p.fdr    | Pathway                                                    | p.fdr    |
| 1 Parkinson’s disease                                        | 0.0147   | Synaptic vesicle cycle                                     | 1        | Epstein-Barr virus infection                               | 5.76E-06 |
| 2 Alzheimer’s disease                                        | 0.0152   | Fluid shear stress & atherosclerosis                       | 1        | Pancreatic cancer                                          | 0.0014   |
| 3 Huntington’s disease                                       | 0.0162   | Herpes simplex infection                                   | 1        | MAPK signaling pathway                                     | 0.0014   |
| 4 Vibrio cholerae infection                                  | 0.1690   | Endocrine and other factor-regulated calcium reabsorption  | 1        | Apoptosis                                                  | 0.0021   |
| 5 Synaptic vesicle cycle                                     | 0.2060   | Vibrio cholerae infection                                  | 1        | Non-small cell lung cancer                                 | 0.0021   |
| 6 Epithelial cell signaling in Helicobacter pylori infection | 0.2060   | Epithelial cell signaling in Helicobacter pylori infection | 1        | Pathways in cancer                                         | 0.0024   |
| 7 Rheumatoid arthritis                                       | 0.3050   | Adherens junction                                          | 1        | Viral carcinogenesis                                       | 0.0024   |
| 8 Retrograde endocannabinoid signaling                       | 0.5240   | Bacterial invasion of epithelial cells                     | 1        | FoxO signaling pathway                                     | 0.0024   |
| 9 Non-alcoholic fatty liver disease (NAFLD)                  | 0.5240   | Gap junction                                               | 1        | Osteoclast differentiation                                 | 0.0026   |
| 10 mTOR signaling pathway                                    | 0.5240   | Rheumatoid arthritis                                       | 1        | Bacterial invasion of epithelial cells                     | 0.0037   |
| inmex_REM                                                    |          | MetaIntegrator                                             |          | RankAgg                                                    |          |
| Pathway                                                      | p.fdr    | Pathway                                                    | p.fdr    | Pathway                                                    | p.fdr    |
| 1 Epstein-Barr virus infection                               | 7.37E-06 | Parkinson’s disease                                        | 0.0024   | Huntington’s disease                                       | 1.03E-08 |
| 2 Leukocyte transendothelial migration                       | 0.0055   | Huntington’s disease                                       | 0.0024   | Parkinson’s disease                                        | 4.79E-07 |
| 3 TNF signaling pathway                                      | 0.0082   | Non-alcoholic fatty liver disease (NAFLD)                  | 0.0139   | Alzheimer’s disease                                        | 5.38E-06 |
| 4 Kaposi’s sarcoma-associated herpesvirus infection          | 0.0107   | Alzheimer’s disease                                        | 0.0242   | Non-alcoholic fatty liver disease (NAFLD)                  | 0.0032   |
| 5 HTLV-I infection                                           | 0.0112   | Epithelial cell signaling in Helicobacter pylori infection | 0.0853   | Cardiac muscle contraction                                 | 0.0087   |
| 6 Hepatitis C                                                | 0.0128   | NOD-like receptor signaling pathway                        | 0.0853   | NOD-like receptor signaling pathway                        | 0.8569   |
| 7 Shigellosis                                                | 0.0128   | Cardiac muscle contraction                                 | 0.1127   | Prion diseases                                             | 1        |
| 8 Non-small cell lung cancer                                 | 0.0128   | Rheumatoid arthritis                                       | 0.1642   | Cell cycle                                                 | 1        |
| 9 Fc gamma R-mediated phagocytosis                           | 0.0169   | Vibrio cholerae infection                                  | 0.1839   | Central carbon metabolism in cancer                        | 1        |
| 10 Pathways in cancer                                        | 0.0208   | Necroptosis                                                | 0.2296   | HIF-1 signaling pathway                                    | 1        |

Table S4: AUC-ROC scores on the 6 independent validation datasets related to **Alzheimer’s disease**, based on the *test signatures* identified by different approaches. The results indicate that GSMA achieves the highest median AUC score among all other competitor approaches.

|   | Datasets | GSMA    | Stouffer | Fisher   | minP     | maxP     | inmex_FEM | inmex_REM | MetaIntgr | RankAgg |
|---|----------|---------|----------|----------|----------|----------|-----------|-----------|-----------|---------|
| 1 | GSE5281  | 82.0596 | 80.0559  | 81.4228  | 80.2578  | 75.6757  | 80.6772   | 80.3044   | 55.7005   | 81.0500 |
| 2 | GSE36980 | 84.5745 | 70.9441  | 75.2660  | 81.2500  | 64.4947  | 60.9043   | 79.7872   | 59.3085   | 70.1463 |
| 3 | GSE28146 | 84.0909 | 76.7045  | 80.1136  | 72.7273  | 59.6591  | 78.4091   | 75.0000   | 57.9545   | 72.1591 |
| 4 | GSE12685 | 85.4167 | 77.0833  | 79.1667  | 77.0833  | 72.9167  | 75.0000   | 83.3333   | 45.8333   | 70.8333 |
| 5 | GSE15222 | 74.1249 | 75.3737  | 74.7387  | 74.2799  | 68.5586  | 74.3285   | 76.5800   | 72.1712   | 61.8711 |
| 6 | GSE39420 | 85.7143 | 86.7347  | 82.6531  | 84.6939  | 52.0408  | 89.7959   | 87.7551   | 89.7959   | 90.8163 |
|   | Median   | 84.3327 | 76.8939  | 79.64015 | 78.67055 | 66.52665 | 76.70455  | 80.0458   | 58.6315   | 71.4962 |

Table S5: The results of the enrichment analysis performed on the genes in the *global signatures* for **influenza** identified by the proposed meta-analysis framework (GSMA) and the eight other existing meta-analysis approaches (Stouffer’s method, Fisher’s method, minP, maxP, inmex\_FEM, inmex\_REM, MetaIntegrator, and RankAggreg). The red line represents 0.5% threshold and the green highlighted cell represents the target pathway. The *global signatures* identified by the GSMA, Stouffer’s method, inmex\_FEM, and inmex\_REM are significantly enriched in genes associated with the target pathway. The signatures produced by the other five existing methods are not enriched in genes associated with the target pathway to a significant level Interestingly, the other significant pathways reported by the enrichment analysis performed on the signatures identified by GSMA, such as *Herpes simplex infection*, *Staphylococcus aureus infection* and *Leishmaniasis*, are also known to have mechanisms similar to that of influenza[14, 15, 16, 17, 18].

| GSMA                                                |          | Stouffer                            |          | Fisher                                    |          |
|-----------------------------------------------------|----------|-------------------------------------|----------|-------------------------------------------|----------|
| Pathway                                             | p.fdr    | Pathway                             | p.fdr    | Pathway                                   | p.fdr    |
| 1 Herpes simplex infection                          | 5.01E-07 | Staphylococcus aureus infection     | 5.92E-06 | Staphylococcus aureus infection           | 4.28E-05 |
| 2 <b>Influenza A</b>                                | 8.42E-06 | Herpes simplex infection            | 7.19E-06 | Herpes simplex infection                  | 1.18E-04 |
| 3 Staphylococcus aureus infection                   | 1.61E-05 | Th1 and Th2 cell differentiation    | 1.56E-04 | Leishmaniasis                             | 0.0014   |
| 4 Leishmaniasis                                     | 0.0012   | Leishmaniasis                       | 2.09E-04 | Systemic lupus erythematosus              | 0.0066   |
| 5 Systemic lupus erythematosus                      | 0.0057   | Th17 cell differentiation           | 3.31E-04 | <b>Influenza A</b>                        | 0.0066   |
| 6 Measles                                           | 0.0057   | Asthma                              | 0.0014   | Tuberculosis                              | 0.0071   |
| 7 Tuberculosis                                      | 0.0069   | Systemic lupus erythematosus        | 0.0014   | Toxoplasmosis                             | 0.0091   |
| 8 Asthma                                            | 0.0115   | <b>Influenza A</b>                  | 0.0017   | Phagosome                                 | 0.0091   |
| 9 Viral myocarditis                                 | 0.0142   | Tuberculosis                        | 0.0019   | Asthma                                    | 0.0097   |
| 10 HTLV-I infection                                 | 0.0157   | Toxoplasmosis                       | 0.0019   | Rheumatoid arthritis                      | 0.0121   |
| minP                                                |          | maxP                                |          | inmex_FEM                                 |          |
| Pathway                                             | p.fdr    | Pathway                             | p.fdr    | Pathway                                   | p.fdr    |
| 1 Herpes simplex infection                          | 0.0412   | Cellular senescence                 | 0.0901   | Herpes simplex infection                  | 2.85E-06 |
| 2 Systemic lupus erythematosus                      | 0.0412   | Complement and coagulation cascades | 0.0901   | Cell cycle                                | 2.89E-06 |
| 3 Staphylococcus aureus infection                   | 0.0437   | Transcriptional misreg. in cancer   | 0.0978   | <b>Influenza A</b>                        | 1.02E-05 |
| 4 Viral myocarditis                                 | 0.0437   | Staphylococcus aureus infection     | 0.0978   | Measles                                   | 2.01E-05 |
| 5 Inflammatory bowel disease (IBD)                  | 0.0437   | Pertussis                           | 0.1992   | Viral carcinogenesis                      | 5.09E-05 |
| 6 Antifolate resistance                             | 0.0437   | <b>Influenza A</b>                  | 0.1992   | Epstein-Barr virus infection              | 6.93E-05 |
| 7 Asthma                                            | 0.0437   | Bladder cancer                      | 0.1993   | Cellular senescence                       | 0.0002   |
| 8 Leishmaniasis                                     | 0.0537   | Herpes simplex infection            | 0.1993   | Th1 and Th2 cell differentiation          | 0.0008   |
| 9 Allograft rejection                               | 0.0615   | Measles                             | 0.1993   | Hepatitis B                               | 0.0008   |
| 10 Graft-versus-host disease                        | 0.0689   | Estrogen signaling pathway          | 0.2862   | p53 signaling pathway                     | 0.0008   |
| inmex_REM                                           |          | MetaIntegrator                      |          | RankAgg                                   |          |
| Pathway                                             | p.fdr    | Pathway                             | p.fdr    | Pathway                                   | p.fdr    |
| 1 Herpes simplex infection                          | 0.0001   | Central carbon metabolism in cancer | 0.5332   | Systemic lupus erythematosus              | 0.0281   |
| 2 <b>Influenza A</b>                                | 0.0028   | Pertussis                           | 0.5332   | Asthma                                    | 0.0867   |
| 3 Viral carcinogenesis                              | 0.0043   | NOD-like receptor signaling pathway | 0.5332   | Non-alcoholic fatty liver disease (NAFLD) | 0.0867   |
| 4 Measles                                           | 0.0043   | Autophagy - animal                  | 0.7784   | Alzheimer’s disease                       | 0.0867   |
| 5 NOD-like receptor signaling pathway               | 0.0043   | Apoptosis                           | 0.7784   | <b>Influenza A</b>                        | 0.0867   |
| 6 Non-small cell lung cancer                        | 0.0173   | Legionellosis                       | 0.7784   | Parkinson’s disease                       | 0.0867   |
| 7 TNF signaling pathway                             | 0.0200   | Cytosolic DNA-sensing pathway       | 0.7784   | Inflammatory bowel disease (IBD)          | 0.0867   |
| 8 Hepatitis B                                       | 0.0207   | Renal cell carcinoma                | 0.7784   | Graft-versus-host disease                 | 0.1006   |
| 9 Kaposi’s sarcoma-associated herpesvirus infection | 0.0221   | Prolactin signaling pathway         | 0.7784   | Phagosome                                 | 0.1006   |
| 10 Epstein-Barr virus infection                     | 0.0237   | B cell receptor signaling pathway   | 0.7784   | Staphylococcus aureus infection           | 0.1006   |



Table S6: AUC-ROC scores on the 6 independent validation datasets related to **influenza**, based on the *test signatures* identified by different approaches. The results indicate that GSMA achieves the highest median AUC score among all other competitor approaches.

|   | Datasets | GSMA    | Stouffer | Fisher  | minP    | maxP    | inmex_FEM | inmex_REM | MetaIntgr | RankAgg |
|---|----------|---------|----------|---------|---------|---------|-----------|-----------|-----------|---------|
| 1 | GSE29366 | 97.3684 | 93.4211  | 89.0351 | 90.7895 | 93.4211 | 93.4211   | 93.4211   | 89.9123   | 92.9825 |
| 2 | GSE34205 | 91.8831 | 81.1688  | 79.3831 | 86.0390 | 90.5844 | 86.8506   | 86.2013   | 81.1688   | 92.6948 |
| 3 | GSE30550 | 91.1765 | 84.9265  | 80.1471 | 79.7794 | 77.2059 | 87.8676   | 88.6029   | 87.8676   | 71.6912 |
| 4 | GSE38900 | 72.0833 | 54.7917  | 42.9167 | 55.2083 | 62.7083 | 57.7083   | 55.8333   | 72.5000   | 64.1667 |
| 5 | GSE20346 | 83.8057 | 55.2632  | 57.8947 | 58.7045 | 56.2753 | 59.9190   | 60.1215   | 68.2186   | 96.9636 |
| 6 | GSE82050 | 84.7222 | 81.9444  | 73.0556 | 85.5556 | 82.5000 | 95.5556   | 72.7778   | 88.8889   | 65.5556 |
|   | Median   | 87.9493 | 81.5566  | 76.2193 | 82.6675 | 79.8529 | 87.3591   | 79.4895   | 84.5182   | 82.1930 |

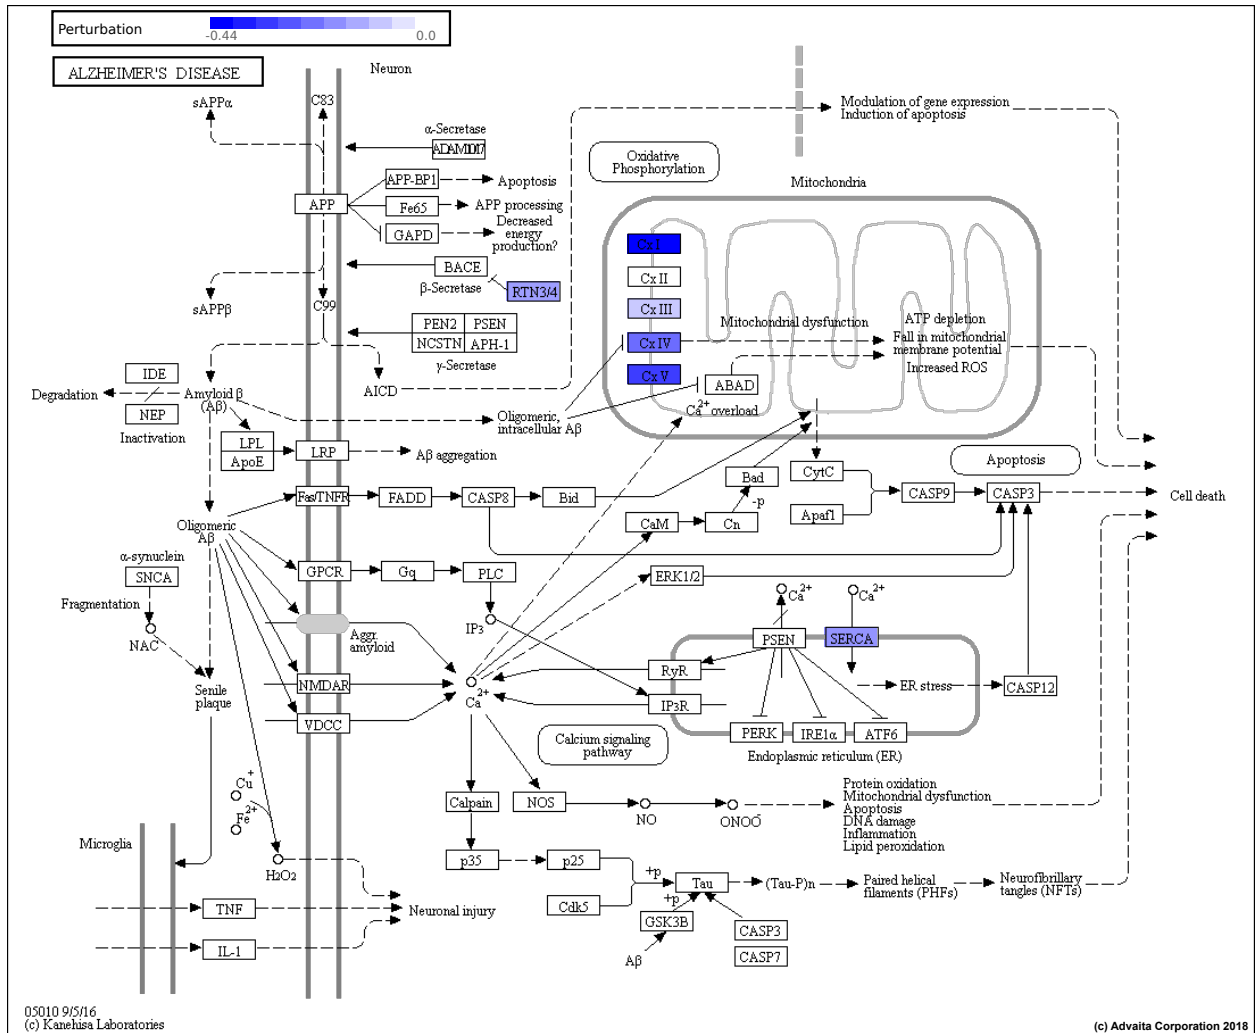

Figure S4: *Alzheimer's disease* pathway generated with iPathwayGuide [19, 20] using the *global signature* identified by the proposed framework - GSMA. Here the blue colors represent the negatively perturbed genes. The majority of the *global signature* genes present in the *Alzheimer's disease* pathway are part of the mitochondrial dysfunction process, which is one of the key factors for Alzheimer's disease progression [21, 22].

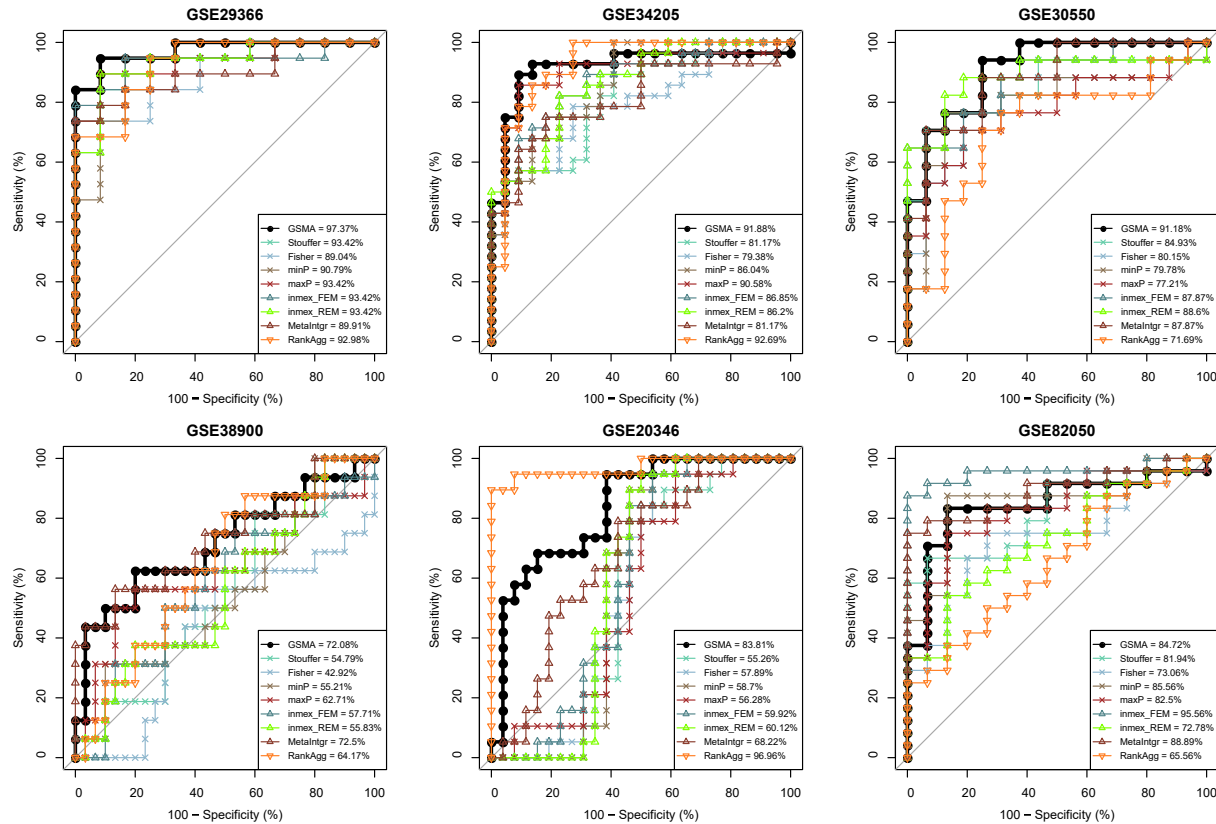

Figure S5: AUC plots across the 6 independent validation datasets related to **influenza** based on the *test signature*, identified by the proposed meta analysis framework - GSMA and eight other existing meta-analysis approaches - Stouffer's method, Fisher's method, minP, maxP, inmx\_FEM, inmx\_REM, MetaIntegrator, and RankAggreg. The signature proposed by GSMA and RankAggreg achieved highest AUC-ROC scores in 2 out of 6 independent datasets. In addition, Table S6 indicates that GSMA achieves the highest median AUC score among all other competitor approaches.

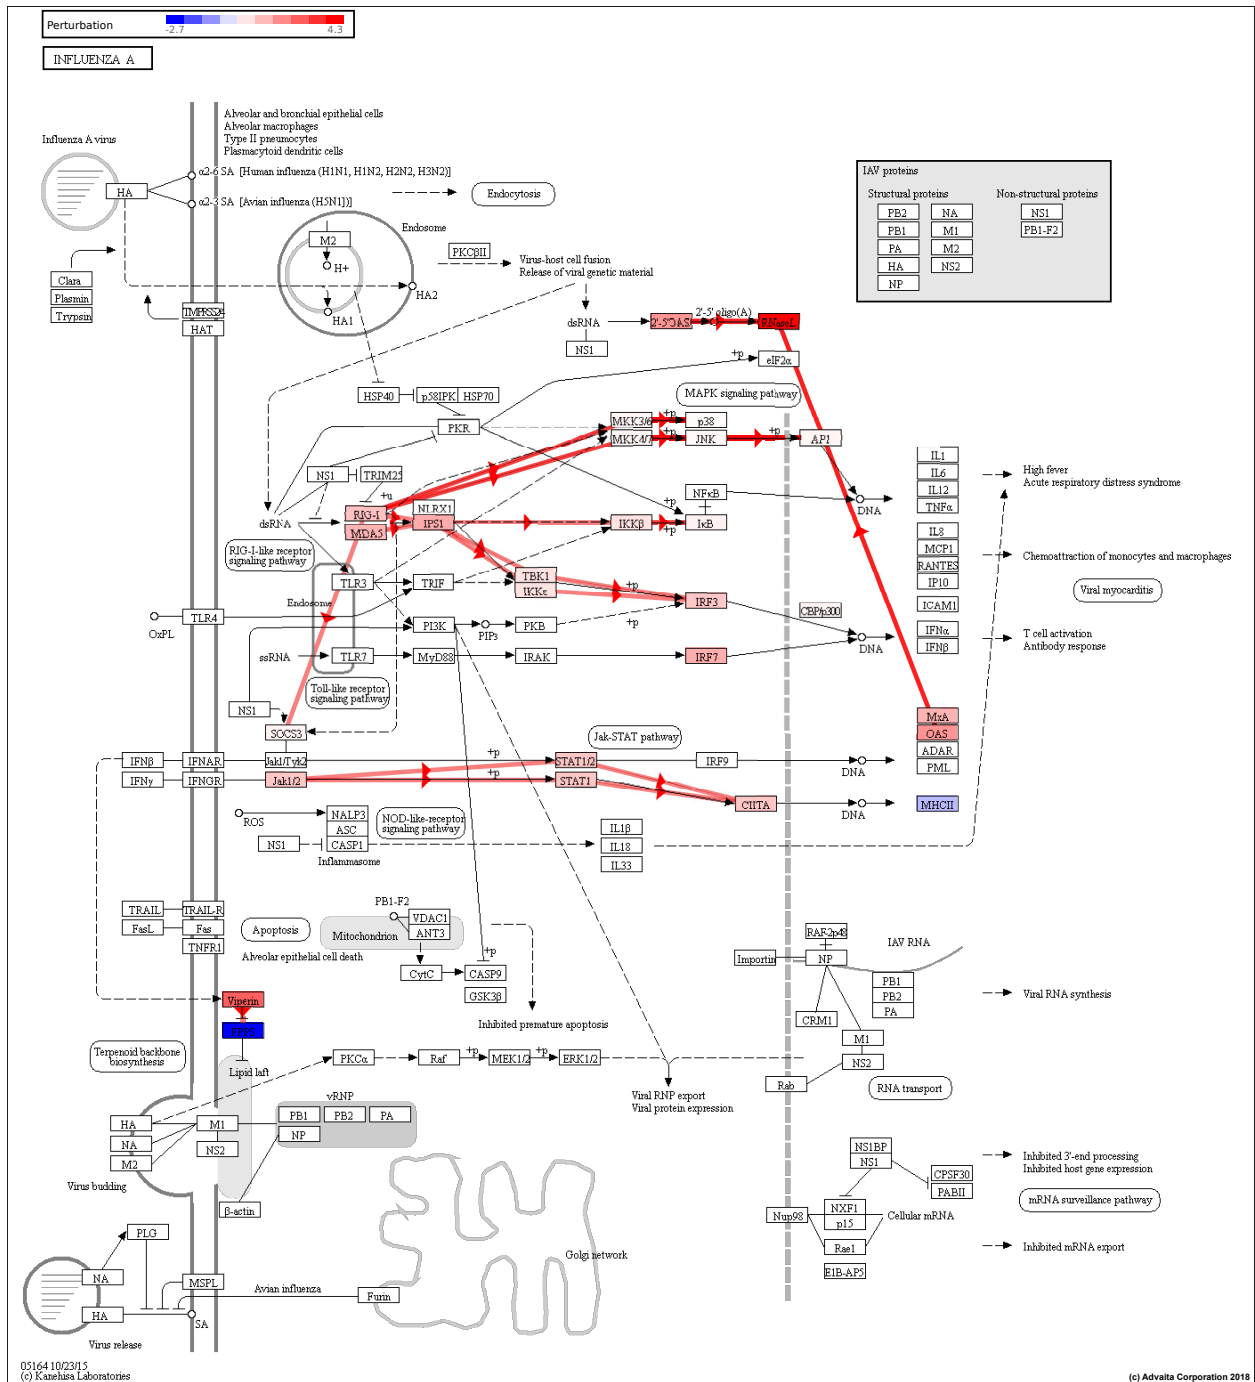

Figure S6: *Influenza A* pathway generated with iPathwayGuide [19, 20] using the *global signature* identified by the proposed framework - GSMA. Here the red colors represent the positively perturbed genes whereas the blue colors represent the negatively perturbed genes. The majority of the positively perturbed genes are part coherent chains of perturbation propagation which can be thought of as putative mechanisms.

Table S7: The top 20 pathways that are enriched with the *global signature* identified by GSMA, and the top 20 pathways that are identified by BLMA, using **Alzheimer’s disease** datasets. The red line represents 0.5% threshold and the green highlighted cell represents the target pathway. The target pathway is significantly enriched and ranked at the top using the *global signature* identified by GSMA. On the other hand, BLMA is not able to identify the target pathway within the top 20 pathways. This shows that the *global signature* identified by GSMA is more powerful than BLMA, in terms of identifying the putative mechanism of a disease.

| GSMA                                                         |          | BLMA                                                       |          |
|--------------------------------------------------------------|----------|------------------------------------------------------------|----------|
| Pathway                                                      | p.fdr    | Pathway                                                    | p.fdr    |
| 1 Alzheimer’s disease                                        | 2.24E-07 | Retrograde endocannabinoid signaling                       | 1.41E-06 |
| 2 Parkinson’s disease                                        | 2.24E-07 | Phagosome                                                  | 9.18E-06 |
| 3 Non-alcoholic fatty liver disease (NAFLD)                  | 3.63E-06 | Synaptic vesicle cycle                                     | 0.0007   |
| 4 Huntington’s disease                                       | 3.12E-05 | Fc gamma R-mediated phagocytosis                           | 0.0010   |
| 5 Retrograde endocannabinoid signaling                       | 0.0028   | HIF-1 signaling pathway                                    | 0.0010   |
| 6 Epithelial cell signaling in Helicobacter pylori infection | 0.0435   | Th1 and Th2 cell differentiation                           | 0.0050   |
| 7 Cardiac muscle contraction                                 | 0.0621   | Tuberculosis                                               | 0.1508   |
| 8 Chagas disease (American trypanosomiasis)                  | 0.1433   | Estrogen signaling pathway                                 | 0.1508   |
| 9 Adipocytokine signaling pathway                            | 0.2786   | Leukocyte transendothelial migration                       | 0.1508   |
| 10 Epstein-Barr virus infection                              | 0.2786   | Leishmaniasis                                              | 0.1508   |
| 11 Rheumatoid arthritis                                      | 0.4724   | Osteoclast differentiation                                 | 0.1508   |
| 12 Necroptosis                                               | 0.4744   | Kaposi’s sarcoma-associated herpesvirus infection          | 0.1508   |
| 13 NOD-like receptor signaling pathway                       | 0.4744   | Rheumatoid arthritis                                       | 0.1508   |
| 14 HIF-1 signaling pathway                                   | 0.4744   | B cell receptor signaling pathway                          | 0.1618   |
| 15 Th17 cell differentiation                                 | 0.4905   | Vibrio cholerae infection                                  | 0.1855   |
| 16 TNF signaling pathway                                     | 0.4905   | Amyotrophic lateral sclerosis (ALS)                        | 0.1855   |
| 17 Herpes simplex infection                                  | 0.4905   | Th17 cell differentiation                                  | 0.1910   |
| 18 Toxoplasmosis                                             | 0.4905   | Cardiac muscle contraction                                 | 0.1930   |
| 19 Vibrio cholerae infection                                 | 0.4905   | Salmonella infection                                       | 0.1930   |
| 20 cAMP signaling pathway                                    | 0.4905   | Epithelial cell signaling in Helicobacter pylori infection | 0.1989   |

Table S8: The top 20 pathways that are enriched with the *global signature* identified by GSMA, and the top 20 pathways that are identified by BLMA, using **influenza** datasets. The red line represents 0.5% threshold and the green highlighted cell represents the target pathway. The target pathway is ranked within the top two significant pathways in both cases. The list of significantly impacted pathways identified by BLMA include several false positive pathways. In contrast, the list of pathways that are significantly enriched with the *global signature* identified by GSMA is much more precise.

| GSMA                                            |          | BLMA                                         |          |
|-------------------------------------------------|----------|----------------------------------------------|----------|
| Pathway                                         | p.fdr    | Pathway                                      | p.fdr    |
| 1 Herpes simplex infection                      | 5.01E-07 | Staphylococcus aureus infection              | 2.60E-14 |
| 2 Influenza A                                   | 8.42E-06 | Influenza A                                  | 4.65E-13 |
| 3 Staphylococcus aureus infection               | 1.61E-05 | Intestinal immune network for IgA production | 1.88E-11 |
| 4 Leishmaniasis                                 | 0.0012   | Phagosome                                    | 9.81E-06 |
| 5 Systemic lupus erythematosus                  | 0.0057   | Systemic lupus erythematosus                 | 1.27E-05 |
| 6 Measles                                       | 0.0057   | Leishmaniasis                                | 6.04E-05 |
| 7 Tuberculosis                                  | 0.0069   | Transcriptional misregulation in cancer      | 0.0001   |
| 8 Asthma                                        | 0.0115   | Acute myeloid leukemia                       | 0.0001   |
| 9 Viral myocarditis                             | 0.0142   | Measles                                      | 0.0002   |
| 10 HTLV-I infection                             | 0.0157   | NOD-like receptor signaling pathway          | 0.0003   |
| 11 Allograft rejection                          | 0.0185   | Graft-versus-host disease                    | 0.0004   |
| 12 Hepatitis B                                  | 0.0217   | Herpes simplex infection                     | 0.0010   |
| 13 Transcriptional misregulation in cancer      | 0.0217   | Epstein-Barr virus infection                 | 0.0012   |
| 14 Cell adhesion molecules (CAMs)               | 0.0217   | Viral carcinogenesis                         | 0.0012   |
| 15 Th17 cell differentiation                    | 0.0217   | Viral myocarditis                            | 0.0013   |
| 16 Pertussis                                    | 0.0244   | Allograft rejection                          | 0.0014   |
| 17 Phagosome                                    | 0.0244   | Asthma                                       | 0.0028   |
| 18 Complement and coagulation cascades          | 0.0265   | Type I diabetes mellitus                     | 0.0031   |
| 19 Intestinal immune network for IgA production | 0.0278   | Antigen processing and presentation          | 0.0058   |
| 20 Cellular senescence                          | 0.0278   | Autoimmune thyroid disease                   | 0.0081   |

## References

- [1] Benjamin Milo Bolstad. *Low-level analysis of high-density oligonucleotide array data: background, normalization and summarization*. PhD thesis, University of California, 2004.
- [2] Gordon K Smyth. Limma: linear models for microarray data. In R. Gentleman, V. Carey, S. Dudoit, R. Irizarry, and W. Huber, editors, *Bioinformatics and Computational Biology Solutions Using R and Bioconductor*, pages 397–420. Springer, New York, 2005.
- [3] Tin Nguyen and Sorin Draghici. *BLMA: A package for bi-level meta-analysis*. Bioconductor, 2017. R package.
- [4] Jianguo Xia, Erin E Gill, and Robert EW Hancock. NetworkAnalyst - a web-based platform for gene expression profiling & biological network analysis. <https://www.networkanalyst.ca/NetworkAnalyst/faces/home.xhtml>, 2015.
- [5] R. C. Gentleman, V. J. Carey, D. M. Bates, B. Bolstad, M. Dettling, S. Dudoit, B. Ellis, L. Gautier, Y. Ge, J. Gentry, K. Hornik, T. Hothorn, W. Huber, S. Iacus, R. Irizarry, F. Leisch, C. Li, M. Maechler, A. J. Rossini, G. Sawitzki, C. Smith, G. Smyth, L. Tierney, J. Y. Yang, and J. Zhang. Bioconductor: open software development for computational biology and bioinformatics. *Genome Biol*, 5(10):R80, 2004.
- [6] Minoru Kanehisa and Susumu Goto. KEGG: kyoto encyclopedia of genes and genomes. *Nucleic Acids Research*, 28(1):27–30, 2000.
- [7] Jianguo Xia, Christopher D Fjell, Matthew L Mayer, Olga M Pena, David S Wishart, and Robert EW Hancock. INMEXa web-based tool for integrative meta-analysis of expression data. *Nucleic Acids Research*, 41(W1):W63–W70, 2013.
- [8] Winston A Haynes, Francesco Vallania, Charles Liu, Erika Bongen, Aurelie Tomczak, Marta Andres-Terrè, Shane Lofgren, Andrew Tam, Cole A Deisseroth, Matthew D Li, et al. Empowering multi-cohort gene expression analysis to increase reproducibility. In *Pacific Symposium on Biocomputing*, pages 144–153, New Jersey, 2017. World Scientific.
- [9] Vasyl Pihur, Susmita Datta, and Somnath Datta. RankAggreg, an R package for weighted rank aggregation. *BMC bioinformatics*, 10(1):62, 2009.
- [10] Do-Geun Kim, Antje Krenz, Leon E Toussaint, Kirk J Maurer, Sudie-Ann Robinson, Angela Yan, Luisa Torres, and Margaret S Bynoe. Non-alcoholic fatty liver disease induces signs of alzheimer’s disease (ad) in wild-type mice and accelerates pathological signs of ad in an ad model. *Journal of Neuroinflammation*, 13(1):1, 2016.
- [11] Gaurav Bedse, Adele Romano, Angelo M Lavecchia, Tommaso Cassano, and Silvana Gaetani. The role of endocannabinoid signaling in the molecular mechanisms of neurodegeneration in alzheimer’s disease. *Journal of Alzheimer’s Disease*, 43(4):1115–1136, 2015.
- [12] Jan Mulder, Misha Zilberter, Susana J Pasquaré, Alán Alpár, Gunnar Schulte, Samira G Ferreira, Attila Köfalvi, Ana M Martín-Moreno, Erik Keimpema, Heikki Tanila, et al. Molecular reorganization of endocannabinoid signalling in Alzheimer’s disease. *Brain*, 134(4):1041–1060, 2011.
- [13] Sang Won Seo, Rebecca F Gottesman, Jeanne M Clark, Ruben Hernaez, Yoosoo Chang, Changsoo Kim, Kyoung Hwa Ha, Eliseo Guallar, and Mariana Lazo. Nonalcoholic fatty liver disease is associated with cognitive function in adults. *Neurology*, 86(12):1136–1142, 2016.
- [14] Lynn M Hassman and David A DiLoreto. Immunologic factors may play a role in herpes simplex virus 1 reactivation in the brain and retina after influenza vaccination. *IDCases*, 6:47–51, 2016.
- [15] Agnieszka Rynda-Applé, Keven M Robinson, and John F Alcorn. Influenza and bacterial superinfection: illuminating the immunologic mechanisms of disease. *Infection and Immunity*, 83(10):3764–3770, 2015.
- [16] Mei-Ho Lee, Carlos Arrecubieta, Francis J Martin, Alice Prince, Alain C Borczuk, and Franklin D Lowy. A postinfluenza model of staphylococcus aureus pneumonia. *The Journal of Infectious Diseases*, 201(4):508–515, 2010.
- [17] Keven M Robinson, Kevin J McHugh, Sivanarayana Mandalapu, Michelle E Clay, Benjamin Lee, Erich V Scheller, Richard I Enelow, Yvonne R Chan, Jay K Kolls, and John F Alcorn. Influenza a virus exacerbates staphylococcus aureus pneumonia in mice by attenuating antimicrobial peptide production. *The Journal of Infectious Diseases*, 209(6):865–875, 2013.
- [18] Katherine Kedzierska, Joan M Curtis, Sophie A Valkenburg, Lauren A Hatton, Hiu Kiu, Peter C Doherty, and Lukasz Kedzierski. Induction of protective cd4+ t cell-mediated immunity by a leishmania peptide delivered in recombinant influenza viruses. *PLoS One*, 7(3):e33161, 2012.
- [19] Advaita Corporation. Pathway Analysis with iPathwayGuide. <http://www.advaitabio.com/ipathwayguide.html>, 2014.

- [20] S Ahsan and S Drăghici. Identifying significantly impacted pathways and putative mechanisms with ipathwayguide. *Current Protocols in Bioinformatics*, 57:7–15, 2017.
- [21] Xinglong Wang, Wenzhang Wang, Li Li, George Perry, Hyung-gon Lee, and Xiongwei Zhu. Oxidative stress and mitochondrial dysfunction in alzheimer’s disease. *Biochimica et Biophysica Acta (BBA)-Molecular Basis of Disease*, 1842(8):1240–1247, 2014.
- [22] Michael H Yan, Xinglong Wang, and Xiongwei Zhu. Mitochondrial defects and oxidative stress in alzheimer’s disease and parkinson disease. *Free Radical Biology and Medicine*, 62:90–101, 2013.
